# Supplementary material
Source: publisher figshare collection journal article supplement (https://sage.figshare.com/ndownloader/files/13438559)
Supplement: Supplementary file 1 [file 13438559]

Supplemental Table 1: Primary factor loading(s) for each test or measure. The maximum (absolute) loading for each test or measure is shown in the highlighted cell, with the report indicated by the author’s first name. When the test or measure had a second relatively high factor loading, that one is also listed without highlighting.

| Test | Fluency | Phonology | | | | Semantics | Executive Functions |
| --- | --- | --- | --- | --- | --- | --- | --- |
|  |  | Production | | Recognition | |  |  |
| **WORD TO PICTURE MATCHING** |  |  | |  | |  |  |
| CSB Spoken Word to Picture Matching |  |  | |  | | Butler **(0.865)** |  |
|  |  | |  | | Halai **(0.722)** |  |
| CSB Written Word to Picture Matching |  |  | |  | | Butler **(0.799)** |  |
|  |  | |  | | Halai **(0.699)** | Halai **(0.578)** |
| Auditory Word to Picture Matching |  |  | |  | | Lacey **(0.708)** |  |
| Peabody Picture Vocabulary Test |  |  | |  | | Mirman a,b **(0.711)** |  |
| WAB Auditory Word Recognition |  |  | |  | | Lacey **(0.738)** |  |
|  |  | | Fridriksson **(0.148)** | | |  |
| **SENTENCE COMPREHENSION** |  |  | |  | |  |  |
| CAT Spoken Sentence Comprehension |  | Butler **(0.681)** | | | |  |  |
|  | Halai **(0.726)** | | | |  |  |
| BDAE Embedded Sentences |  | Lacey **(0.511)** | | | |  |  |
| BDAE Complex Ideational Material |  |  | |  | | Lacey **(0.609)** |  |
| WAB Sequential Commands |  |  | |  | | Lacey **(0.725)** |  |
|  |  | | Fridriksson **(0.173)** | | |  |
| WAB Yes/No Questions |  |  | |  | | Lacey **(0.737)** |  |
|  |  | | Fridriksson **(0.185)** | | |  |
| **NAVS Sentence Comprehension Test**  *Active Sentences* |  |  | |  | |  |  |
|  |  | | Fridriksson **(0.185)** | | |  |
| *Passive Sentences* |  |  | | Fridriksson **(0.023)** | | |  |
| *Truncated Passives* |  |  | | Fridriksson **(0.241)** | | |  |
| *Cleft Sentences with Subject Gaps* |  |  | | Fridriksson **(0.193)** | | |  |
| *Cleft Sentences with Object Gaps* |  |  | | Fridriksson **(0.122)** | | |  |
| *Accuracy between canonical vs. noncanonical* |  | Fridriksson **(-0.001)** | |  | |  |  |
| *Correct responses for noncanonical sentences* |  |  | | Fridriksson **(0.086)** | | |  |
| **REPETITION** | | | | | | | |
| **Word Repetition** |  |  | |  | |  |  |
| Philadelphia Repetition Test |  | Mirman a,b **(0.842)** | |  | |  |  |
| Word Repetition: Delayed |  | Butler **(0.868)** | | | |  |  |
|  | Halai **(0.783)** | | | |  |  |
| Word Repetition: Immediate |  | Butler **(0.872)** | | | |  |  |
|  | Halai **(0.780)** | | | |  |  |
| WAB Speech Repetition | Lacey **(0.540)** | Lacey **(0.612)** | | | |  |  |
|  |  | Fridriksson **(0.150)** | | | |  |
| **Non-Word Repetition** |  |  | | | |  |  |
| Pseudoword Repetition |  | Lacey **(0.686)** | | | |  |  |
| Non-Word Repetition: Delayed |  | Butler **(0.917)** | | | |  |  |
|  | Halai **(0.912)** | | | |  |  |
| Non-Word Repetition: Immediate |  | Butler **(0.868)** | | | |  |  |
|  | Halai **(0.822)** | | | |  |  |
|  | Mirman a,b **(0.712)** | |  | |  |  |
| **APRAXIA** |  |  | |  | |  |  |
| **Apraxia Battery for Adults (ABA)** |  |  | |  | |  |  |
| *Repeated Trials* |  | Fridriksson **(-0.073)** | |  | |  |  |
| *Utterance Time* |  |  | | Fridriksson **(0.091)** | | |  |
| *Diadochokinetic Rate* |  | Fridriksson **(-0.089)** | |  | |  |  |
| *Increasing Word Length* |  | Lacey **(0.815)** | | | |  |  |
|  |  | | Fridriksson **(0.034)** | | |  |
| *AOS Inventory Rating* |  | Fridriksson **(-0.043)** | |  | |  |  |
| **Apraxia of Speech Rating Scale (ASRS)** |  |  | |  | |  |  |
| *Errors uniquely attributed to AOS** |  | Fridriksson **(-0.150)** | |  | |  |  |
| *Errors due to AOS or dysarthria** |  | Fridriksson **(-0.147)** | |  | |  |  |
| *Errors due to AOS or aphasia** |  | Fridriksson **(-0.100)** | |  | |  |  |
| *Errors due to AOS, aphasia, or dysarthria* |  | Fridriksson **(-0.090)** | |  | |  |  |
| **SENTENCE PRODUCTION** | | | | | | | |
| **Sentence Production Priming Test (SPPT)** |  |  | |  | |  |  |
| *Noncanonical vs. canonical production errors* |  | Fridriksson **(-0.031)** | |  | |  |  |
| *NC vs. C production errors for valid attempts* |  | Fridriksson **(-0.020)** | |  | |  |  |
| **Argument Structure Production Test (ASPT)** |  |  | |  | |  |  |
| *Accuracy of optional two-place verbs* |  |  | | Fridriksson **(0.103)** | | |  |
| *Accuracy of optional three-place verbs* |  |  | | Fridriksson **(0.097)** | | |  |
| **READING & WRITING** | | | | | | | |
| Reading Real Words | Lacey **(0.791)** |  | |  | |  |  |
| Reading Pseudowords | Lacey **(0.486)** | Lacey **(0.518)** | | | |  |  |
| WAB Reading |  |  | | | Fridriksson **(0.146)** | |  |
| WAB Writing |  |  | | | Fridriksson **(0.040)** | |  |
| **The Grandfather Passage Reading** |  |  | |  | |  |  |
| *Total Read Words* |  |  | | Fridriksson **(0.066)** | | |  |
| *Total Different Words Read* |  |  | | Fridriksson **(0.050)** | | |  |
| *Semantic Errors* |  | Fridriksson **(-0.043)** | |  | |  |  |
| *Phonological Errors* |  | Fridriksson **(-0.077)** | |  | |  |  |
| *Word Produced Unrelated to Passage* |  | Fridriksson **(-0.016)** | |  | |  |  |
| **SPEECH FLUENCY** |  |  | |  | |  |  |
| TTR (semantic variety) |  |  | |  | | Halai **(0.749)** |  |
| MLU (complexity) | Halai **(0.814)** |  | |  | |  |  |
| T (fluency) | Halai **(0.818)** |  | |  | |  |  |
| WPM (words per minute) | Halai **(0.716)** |  | |  | |  |  |
| WAB Spontaneous Speech Fluency | Lacey **(0.695)** | Fridriksson **(-0.050)** | |  | |  |  |
| WAB Spontaneous Speech Content | Lacey **(0.678)** | Fridriksson **(-0.023)** | |  | |  |  |
| **Speech Entrainment** |  | | | | | | |
| *Total Different Words Produced* |  | Fridriksson **(-0.024)** | |  | |  |  |
| *Total Real Words Produced* |  | Fridriksson **(-0.039)** | |  | |  |  |
| **Discourse** |  | | | | | | |
| *Phonemic Errors* |  | Fridriksson **(-0.156)** | |  | |  |  |
| *Semantic Errors* |  |  | | Fridriksson **(0.141)** | | |  |
| *Total Different Words* |  | Fridriksson **(-0.144)** | |  | |  |  |
| *Total Real Words* |  | Fridriksson **(-0.174)** | |  | |  |  |
| **NAMING** |  |  | |  | |  |  |
| CSB: Picture Naming Test |  | Butler **(0.725)** | | | | Butler **(0.646)** |  |
|  | Halai **(0.712)** | | | | Halai **(0.600)** |  |
| Boston Naming Test |  | Butler **(0.688)** | | | | Butler **(0.649)** |  |
|  | Halai **(0.659)** | | | | Halai **(0.629)** |  |
|  |  | | Fridriksson **(0.170)** | | |  |
| WAB Object Naming | Lacey **(0.840)** |  | |  | |  |  |
|  |  | | Fridriksson **(0.151)** | | |  |
| University of South Carolina Naming Test |  |  | | Fridriksson **(0.084)** | | |  |
| **Philadelphia Naming Test (total correct)** | Lacey **(0.842)** | Mirman a,b **(0.624)** | |  | | Mirman a,b **(0.593)** |  |
|  |  | | Fridriksson **(0.058)** | | |  |
| *Self-Corrections* |  | Fridriksson **(-0.084)** | |  | |  |  |
| *Semantic Paraphasias* |  |  | | Fridriksson **(0.067)** | | |  |
| *Mixed Paraphasias* |  |  | | Fridriksson **(0.048)** | | |  |
| *Neologisms* |  | Fridriksson **(-0.018)** | |  | |  |  |
| *Phonemic Paraphasias* |  | Mirman a,b **(-0.892)** | | Fridriksson **(0.095)** | | |  |
| *Articulation Errors* |  | Fridriksson **(-0.159)** | |  | |  |  |
| *Perseverations* |  | Fridriksson **(-0.126)** | |  | |  |  |
| *No Response* |  |  | | Fridriksson **(0.142)** | | |  |
| *Unrelated Response* |  |  | | Fridriksson **(0.120)** | | |  |
| *Written Naming* | Lacey **(0.618)** |  | |  | |  | Lacey **(0.566)** |
| **WORD FINDING** | | | | | | | |
| Category Fluency | Lacey **(0.740)** |  | |  | |  |  |
| Letter Fluency | Lacey **(0.560)** |  | |  | |  |  |
| WAB Sentence Completion | Lacey **(0.606)** |  | |  | | Lacey **(0.488)** |  |
|  |  | | Fridriksson **(0.136)** | | |  |
| WAB Responsive Speech | Lacey **(0.730)** |  | | Fridriksson **(0.110)** | | |  |
| WAB Word Fluency |  |  | | Fridriksson **(0.026)** | | |  |
| **PHONOLOGICAL DISCRIMINATION** |  |  | |  | |  |  |
| Minimal Pairs: Non-Words |  | Butler **(0.581)** | | | |  | Butler **(0.642)** |
|  | Halai **(0.584)** | | | |  | Halai **(0.683)** |
| Minimal Pairs: Words |  | Butler **(0.600)** | | | |  |  |
|  | Halai **(0.586)** | | | |  | Halai **(0.505)** |
| Phoneme Discrimination-Delay |  |  | | Mirman a,b **(0.764)** | |  |  |
| Phoneme Discrimination-No Delay |  |  | | Mirman a,b **(0.827)** | |  |  |
| Rhyme Discrimination |  | Mirman a,b **(0.444)** | | Mirman a,b **(0.493)** | |  |  |
| Auditory Lexical Decision |  |  | | Mirman a,b **(0.790)** | |  |  |
| **SEMANTIC MATCHING** | | | | | | | |
| Camel and Cactus Test |  |  | |  | | Mirman a,b **(0.922)** | Butler **(0.731)** |
|  |  | |  | |  | Halai **(0.702)** |
| Pyramids and Palm Trees Test |  |  | |  | | Lacey **(0.569)** | Lacey **(0.643)** |
|  |  | |  | | Mirman a,b **(0.842)** |  |
| 96-Synonym Judgement |  |  | |  | | Butler **(0.665)** |  |
|  |  | |  | | Halai **(0.714)** |  |
| Synonymy Triplets |  |  | |  | | Mirman a,b **(0.824)** |  |
| Semantic Category Discrimination |  |  | |  | | Mirman a,b **(0.710)** |  |
| BDAE Semantic Probe |  |  | |  | | Lacey **(0.831)** |  |
| **GENERAL COGNITION** |  |  | |  | |  |  |
| Raven’s Colored Progressive Matrices |  |  | |  | |  | Butler **(0.938)** |
|  |  | |  | |  | Halai **(0.918)** |
| Brixton Spatial Anticipation Test |  |  | |  | |  | Butler **(0.654)** |
|  |  | |  | |  | Halai **(0.629)** |
| Cognitive Linguistic Quick Test |  |  | |  | |  | Lacey **(0.839)** |
| **WORKING MEMORY** | | | | | | | |
| Forward Digit Span |  | Butler **(0.882)** | | | |  |  |
|  | Halai **(0.841)** | | | |  |  |
|  | Lacey **(0.668)** | | | |  |  |
| Backward Digit Span |  | Lacey **(0.565)** | | | |  | Lacey **(0.621)** |
|  | Butler **(0.764)** | | | |  |  |
|  | Halai **(0.774)** | | | |  |  |
| Semantic Category Probe Test |  |  | |  | | Mirman a,b **(0.730)** |  |
| Rhyme Probe Test |  | Mirman a,b **(0.495)** | | Mirman a,b **(0.468)** | |  |  |
| Immediate Serial Recall Span |  | Mirman a,b **(0.663)** | |  | |  |  |

*these tests were comprised of between 2-6 sub-scores. The average of the loadings for the sub-scores are reported for each overall test.
